# Supplementary material
Source: publisher figshare collection journal article supplement (https://acs.figshare.com/ndownloader/files/12471323)
Supplement: Supplementary file 1 [file 12471323]

## Supplementary Information

### Grafting Functional Groups in Polymeric Binder Towards Enhancing Structural Integrity of $\text{Li}_x\text{SiO}_2$ Anode During Electrochemical Cycling

Kyoungmin Min<sup>1,\*</sup>, Aravind R. Rammohan<sup>2</sup>, Sung Hoon Lee<sup>3</sup>, Sushmit Goyal<sup>2</sup>, Hyunhang Park<sup>3</sup>, Ross Stewart<sup>2</sup>, Xiaoxia He<sup>2</sup>, and Eunseog Cho<sup>1,\*</sup>

<sup>1</sup>Platform Technology Lab, Samsung Advanced Institute of Technology, 130 Samsung-ro, Suwon, Gyeonggi-do, 16678, Republic of Korea

<sup>2</sup>Science and Technology Division, Corning Incorporated, One Science Center Drive, Corning, New York 14831, United States

<sup>3</sup>Corning Technology Center Korea, Asan, Chungcheongnam-do, 31454, Republic of Korea

\*Corresponding Author, E-mail: [kmin.min@samsung.com](mailto:kmin.min@samsung.com) (K. Min), [eunseog.cho@samsung.com](mailto:eunseog.cho@samsung.com) (E. Cho)

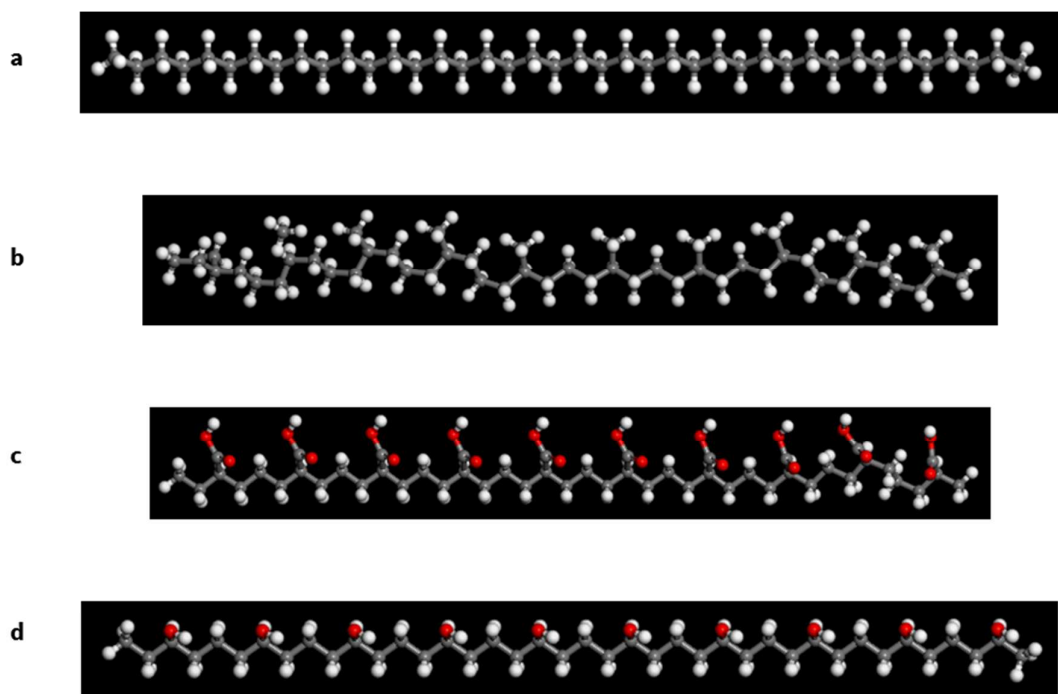

**Figure S1.** (a) The single chain of polyethylene (PE-H) with 20 repeating units and the grafted functional group of (b) CH<sub>3</sub> (PE-CH<sub>3</sub>), (c) COOH (PE-COOH), and (d) OH (PE-OH). Each color of the ball represents H (white), C (gray), and O (red), respectively.

|                    | Volume (Å <sup>3</sup> ) |          |          |          | Porosity |
|--------------------|--------------------------|----------|----------|----------|----------|
|                    | Connolly                 | Total    | Occupied | Free     |          |
| PE-CH <sub>3</sub> | 27.23                    | 77316.90 | 57419.27 | 19897.63 | 25.74    |
| PE-H               | 6.85                     | 61954.84 | 46649.88 | 15304.96 | 24.70    |
| PE-OH              | 19.30                    | 61219.49 | 50950.15 | 10269.34 | 16.77    |
| PE-COOH            | 37.52                    | 75001.46 | 62532.21 | 12469.25 | 16.63    |

**Table S1.** Connolly volume of the functional group, total volume of the simulation box with FMP, occupied volume of FMP, free volume, and porosity for the bulk FMPs.

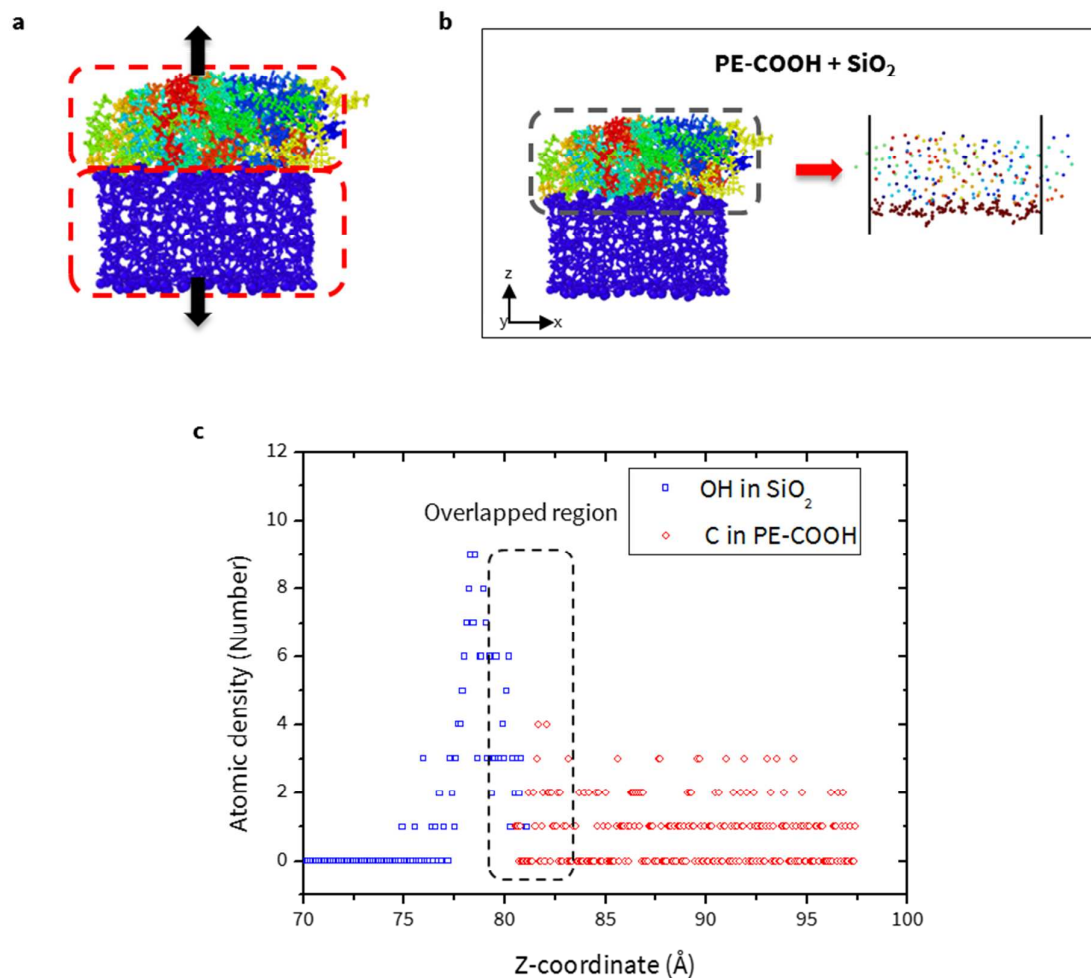

**Figure S2.** (a) The schematic view of how pulling test is performed. The dotted red box is where the pulling velocity is applied and the black arrow is the direction of pulling. (b) (Left) The hybrid structure of PE-COOH + SiO<sub>2</sub> and (Right) the distribution of atomic species of H and O in the hydroxyl group on the top of SiO<sub>2</sub> and C from PE and (c) their resulting atomic density in the *z*-direction.

|                                | PE-CH <sub>3</sub> | PE-H     | PE-OH    | PE-COOH  |
|--------------------------------|--------------------|----------|----------|----------|
| # of atoms                     | 28                 | 23       | 62       | 36       |
| Volume (Å <sup>3</sup> )       | 1863.02            | 2041.65  | 2001.02  | 1193.53  |
| Density<br>(# of atoms/volume) | 0.015029           | 0.011265 | 0.030984 | 0.030163 |

**Table S2.** The number of H and O in the hydroxyl group on the top of SiO<sub>2</sub> and C from PE, overlapped volume in **Figure S2**, and their density for the slab structure of FMPs + SiO<sub>2</sub>. For computing the volume of the occupied region, the length in z-direction (out-of-plane) is computed between the maximum and minimum value of the z-coordinate from the OH in SiO<sub>2</sub> and C in FMPs is obtained, respectively, while the in-plane length (x- and y-length) is given from the simulation box.

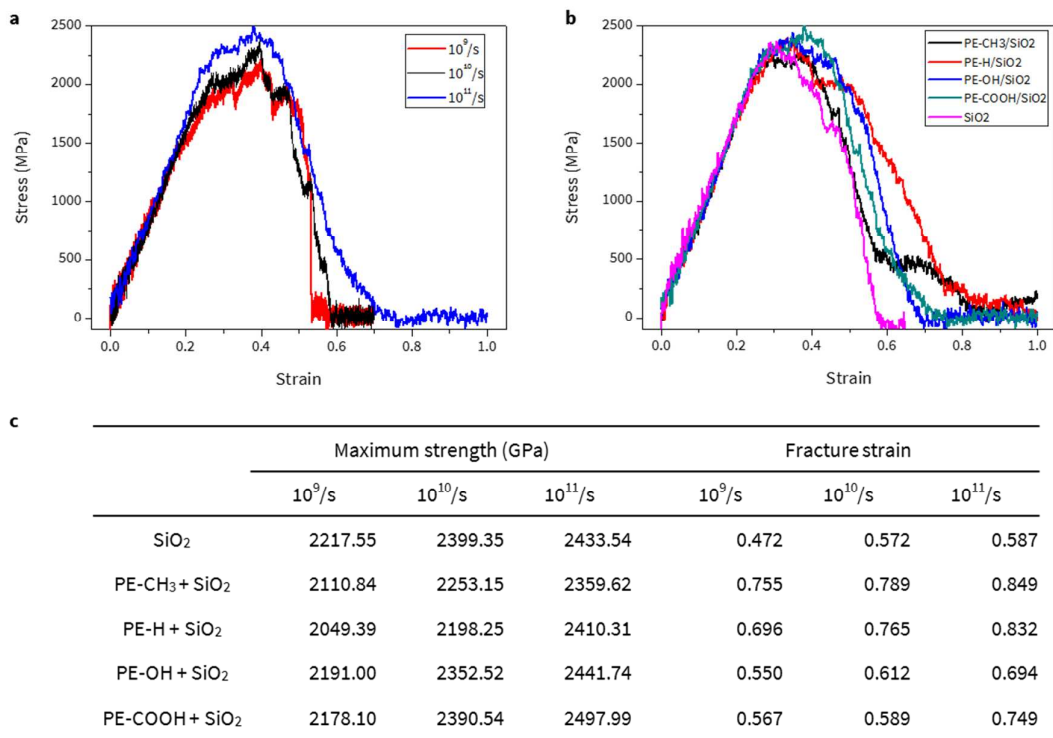

**Figure S3.** Stress-strain curve for the slab structure of (a) PE-COOH + SiO<sub>2</sub> under the strain rate of  $10^9/s$  to  $10^{11}/s$  and (b) FMP + SiO<sub>2</sub> under the strain rate of  $10^{11}/s$ . (c) Maximum strength and the fracture strain for the slab structure of SiO<sub>2</sub> and FMPs + SiO<sub>2</sub> under the strain rate of  $10^9/s$  to  $10^{11}/s$

|      | $\text{Li}_x\text{SiO}_2$             |                              |             | $\text{PE-H} + \text{Li}_x\text{SiO}_2$ |                              |             | $\text{PE-COOH} + \text{Li}_x\text{SiO}_2$ |                              |             |
|------|---------------------------------------|------------------------------|-------------|-----------------------------------------|------------------------------|-------------|--------------------------------------------|------------------------------|-------------|
|      | Density<br>( $\text{g}/\text{cm}^3$ ) | Volume<br>( $\text{\AA}^3$ ) | Vol. Strain | Density<br>( $\text{g}/\text{cm}^3$ )   | Volume<br>( $\text{\AA}^3$ ) | Vol. Strain | Density<br>( $\text{g}/\text{cm}^3$ )      | Volume<br>( $\text{\AA}^3$ ) | Vol. Strain |
| Li=0 | 2.360                                 | 25061.35                     | n/a         | 1.735                                   | 63521.06                     | n/a         | 1.789                                      | 69784.43                     | n/a         |
| Li=1 | 2.222                                 | 29796.21                     | 0.188       | 1.794                                   | 67143.49                     | 0.057       | 1.845                                      | 73238.64                     | 0.049       |
| Li=2 | 2.155                                 | 33999.83                     | 0.357       | 1.730                                   | 75565.55                     | 0.190       | 1.789                                      | 81248.40                     | 0.164       |
| Li=3 | 2.042                                 | 39323.92                     | 0.569       | 1.674                                   | 84254.18                     | 0.326       | 1.739                                      | 89522.85                     | 0.283       |
| Li=4 | 1.937                                 | 45094.81                     | 0.799       | 1.653                                   | 91538.69                     | 0.441       | 1.699                                      | 97672.15                     | 0.400       |

**Table S3.** Density, volume, and volumetric strain change during lithiation for the confined structure of  $\text{Li}_x\text{SiO}_2$ ,  $\text{PE-H} + \text{Li}_x\text{SiO}_2$ , and  $\text{PE-COOH} + \text{Li}_x\text{SiO}_2$  when  $x=0$  to 4.

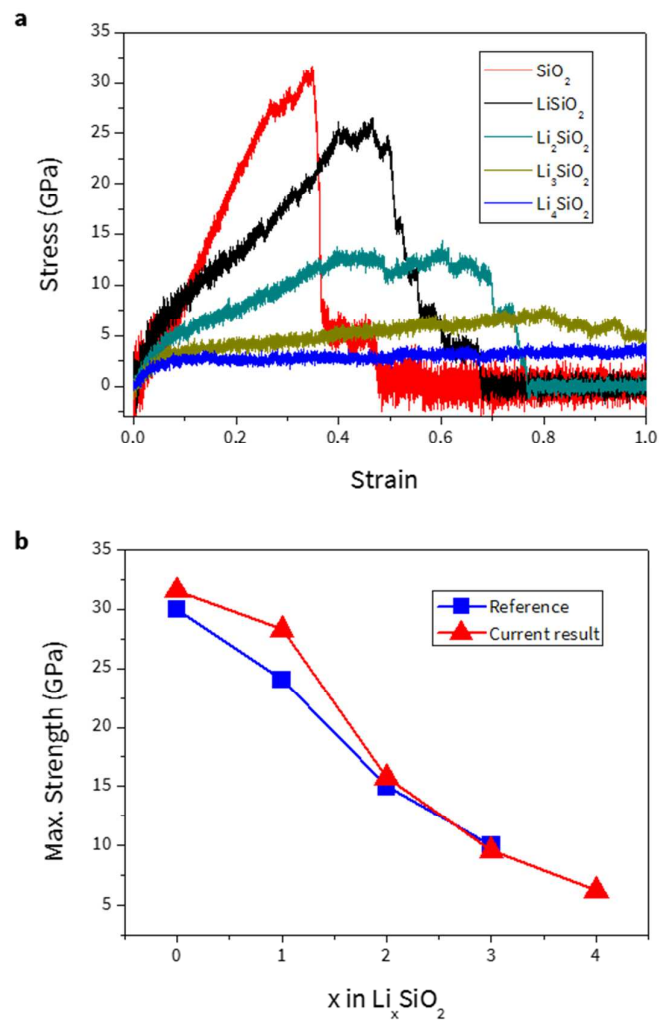

**Figure S4.** (a) Stress-strain curve of  $\text{Li}_x\text{SiO}_2$  ( $x=0$  to 4) under the strain rate of  $10^{10}/\text{s}$  and (b) corresponding maximum strength with reference values from previous reference (J. Phys. Chem. A 2016, 120, 2114–2127).



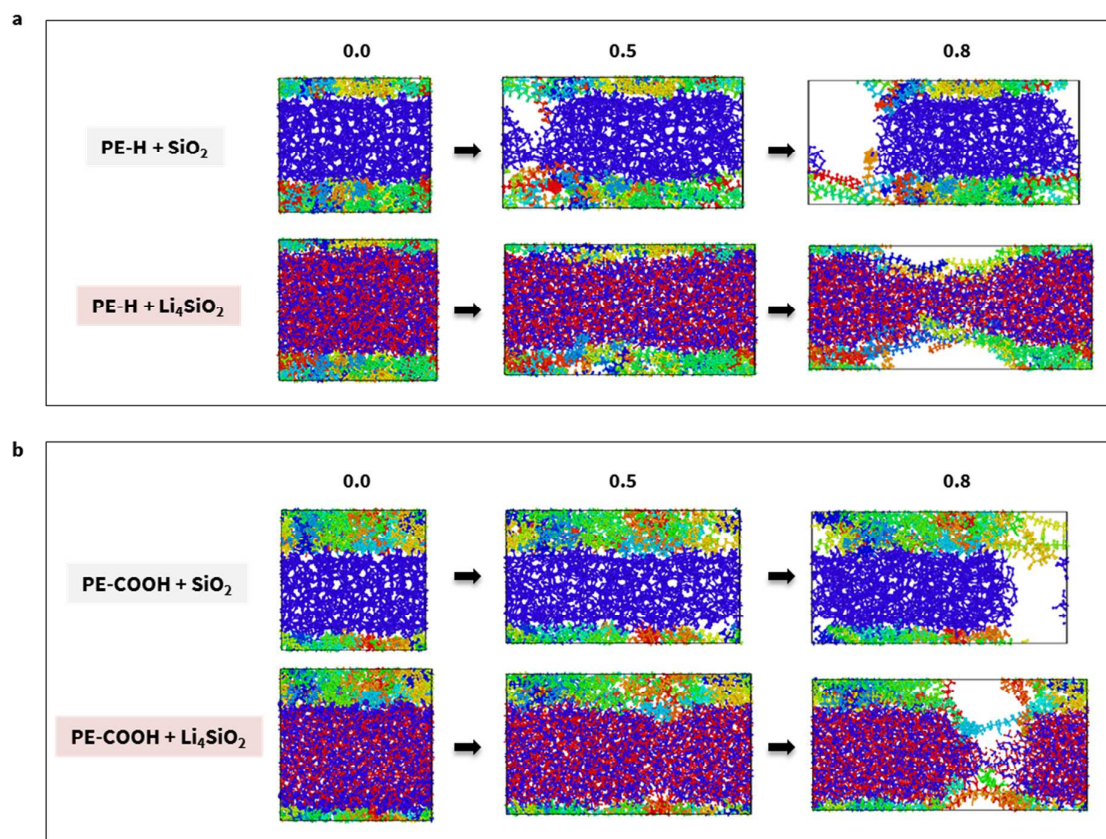

**Figure S5.** The atomic snapshots during tensile test for the confined structure of (a) PE-H + SiO<sub>2</sub> and PE-H + Li<sub>4</sub>SiO<sub>2</sub> and (b) PE-COOH + SiO<sub>2</sub> and PE-COOH + Li<sub>4</sub>SiO<sub>2</sub> at the strain rate of 10<sup>10</sup>/s. Each number corresponds to the applied strain.

| Interfacial surface area ( $\text{\AA}^2$ ) | PE-H + $\text{Li}_x\text{SiO}_2$ | PE-COOH + $\text{Li}_x\text{SiO}_2$ |
|---------------------------------------------|----------------------------------|-------------------------------------|
| Li=0                                        | 1737.014                         | 1734.086                            |
| Li=1                                        | 1751.883                         | 1736.808                            |
| Li=2                                        | 1911.877                         | 1893.519                            |
| Li=3                                        | 2087.618                         | 2025.066                            |
| Li=4                                        | 2198.352                         | 2129.519                            |

**Table S4.** Interfacial surface area for the confined structure PE-H +  $\text{Li}_x\text{SiO}_2$  and PE-COOH +  $\text{Li}_x\text{SiO}_2$  when  $x=0$  to 4. The surface area is approximated by obtaining it from the in-plane length (x- and y-dimension).
